# Supplementary material for: Selective under-representation of Pacific peoples in population estimates for health indicator measurements in Aotearoa New Zealand misinforms policy making
Source: BMC Public Health. 2024 Feb 22;24:564. doi: 10.1186/s12889-024-17984-2 (PMC10882897; doi:10.1186/s12889-024-17984-2)
Supplement: Supplementary file 2 — Additional file 2. [file 12889_2024_17984_MOESM2_ESM.xlsx]

## Sheet: Suplement table 1
	A. HSU2020 population (published as denominator by MoH with COVID-19 vaccination coverage)																			B. HSU2021 population (published as denominator by MoH with COVID-19 vaccination coverage)																			C. Difference between HSU population 2020 and HSU population 2021
			Māori			Pacific			Asian			European/Other			Gender unknown	Ethnicity unknown	Various	Total by DHB				Māori			Pacific			Asian			European/Other			Gender unknown	Ethnicity unknown	Various	Total by DHB					Māori			Pacific			Asian
	Former DHB area		Male	Female	Total	Male	Female	Total	Male	Female	Total	Male	Female	Total						Former DHB area		Male	Female	Total	Male	Female	Total	Male	Female	Total	Male	Female	Total						Former DHB area			Male	Female	Total	Male	Female	Total	Male	Female
	Auckland		17102	18080	35182	28694	29936	58630	71769	78530	150299	121764	124381	246145	241	1516		492013		Auckland		18269	18656	36925	29955	30653	60608	82616	85120	167736	127700	125566	253266	0	0		518535		Auckland			1167	576	1743	1261	717	1978	10847	6590
	Bay of Plenty		31108	32783	63891	2504	2294	4798	8245	8448	16693	83637	89792	173429	8	257		259076		Bay of Plenty		32759	34155	66914	3743	2584	6327	11087	10032	21119	87158	92133	179291	59	0		273710		Bay of Plenty			1651	1372	3023	1239	290	1529	2842	1584
	Canterbury		24974	24997	49971	8692	8214	16906	31343	33748	65091	211984	219360	431344	101	2741		566154		Canterbury		26726	26520	53246	9392	8682	18074	38012	38387	76399	222370	225709	448079	322	0		596120		Canterbury			1752	1523	3275	700	468	1168	6669	4639
	Capital and Coast		16851	17853	34704	11532	12206	23738	20329	23508	43837	101484	108769	210253	153	2491		315176		Capital and Coast		17564	18285	35849	12070	12458	24528	23190	25487	48677	106340	110551	216891	474	0		326419		Capital and Coast			713	432	1145	538	252	790	2861	1979
	Counties Manukau		41087	45181	86268	73116	76979	150095	78422	79225	157647	97719	98312	196031	192	2146		592379		Counties Manukau		42571	46079	88650	76923	79677	156600	88625	84967	173592	100883	98578	199461	618	0		618921		Counties Manukau			1484	898	2382	3807	2698	6505	10203	5742
	Hawke's Bay		21833	24125	45958	3511	3240	6751	4000	4293	8293	54808	58158	112966	19	426		174413		Hawke's Bay		22930	24959	47889	4888	3386	8274	5159	4989	10148	56526	59166	115692	199	0		182202		Hawke's Bay			1097	834	1931	1377	146	1523	1159	696
	Hutt Valley		12663	12896	25559	6172	6234	12406	10226	11127	21353	46898	48787	95685	8	359		155370		Hutt Valley		13205	13309	26514	6427	6473	12900	11764	12125	23889	47547	48655	96202	54	0		159559		Hutt Valley			542	413	955	255	239	494	1538	998
	Lakes		19264	20715	39979	1510	1423	2933	3850	4138	7988	30943	31893	62836	0	651		114387		Lakes		20385	21634	42019	1620	1472	3092	4833	4624	9457	31976	32194	64170	0	0		118738		Lakes			1121	919	2040	110	49	159	983	486
	MidCentral		16103	17487	33590	3045	2942	5987	6157	6827	12984	61821	66205	128026	5	1142		181734		MidCentral		17390	18406	35796	3286	3126	6412	7467	7696	15163	64807	67025	131832	30	0		189233		MidCentral			1287	919	2206	241	184	425	1310	869
	Nelson Marlborough		7450	8000	15450	1589	1240	2829	3213	3855	7068	65036	66502	131538	7	550		157442		Nelson Marlborough		7936	8324	16260	3166	1376	4542	4178	4508	8686	67413	68016	135429	373	0		165290		Nelson Marlborough			486	324	810	1577	136	1713	965	653
	Northland		32958	35018	67976	1991	1866	3857	3183	3806	6989	57051	57210	114261	0	299		193382		Northland		34431	36366	70797	2259	2006	4265	3968	4282	8250	59531	58943	118474	16	0		201802		Northland			1473	1348	2821	268	140	408	785	476
	South Canterbury		2346	2437	4783	641	554	1195	1496	1539	3035	25975	26153	52128	0	17		61158		South Canterbury		2474	2541	5015	799	601	1400	1897	1684	3581	26340	26321	52661	19	0		62676		South Canterbury			128	104	232	158	47	205	401	145
	Southern		15761	15999	31760	4069	3944	8013	9860	11103	20963	135006	138737	273743	34	659		335172		Southern		16596	16690	33286	4810	4197	9007	12525	12656	25181	140347	141965	282312	451	0		350237		Southern			835	691	1526	741	253	994	2665	1553
	Tairāwhiti		12458	13460	25918	688	499	1187	674	712	1386	11348	11420	22768	0	118		51377		Tairāwhiti		13007	13781	26788	830	522	1352	907	825	1732	11662	11598	23260	6	0		53138		Tairāwhiti			549	321	870	142	23	165	233	113
	Taranaki		10688	11615	22303	897	789	1686	2490	2803	5293	45822	47434	93256	17	465		123020		Taranaki		11374	12061	23435	968	838	1806	3056	3135	6191	47817	48446	96263	13	0		127708		Taranaki			686	446	1132	71	49	120	566	332
	Waikato		45689	48699	94388	6990	6858	13848	20875	21938	42813	134351	139418	273769	50	5360		430228		Waikato		48361	50854	99215	7543	7266	14809	25227	24538	49765	141839	143586	285425	159	0		449373		Waikato			2672	2155	4827	553	408	961	4352	2600
	Wairarapa		4198	4386	8584	552	505	1057	723	799	1522	18100	19150	37250	0	133		48546		Wairarapa		4428	4549	8977	609	535	1144	941	885	1826	18787	19546	38333	0	0		50280		Wairarapa			230	163	393	57	30	87	218	86
	Waitematā		27042	28472	55514	23820	24425	48245	73023	81767	154790	181408	187463	368871	180	1486		629086		Waitematā		28076	29027	57103	25021	25135	50156	83308	88917	172225	187279	188993	376272	691	0		656447		Waitematā			1034	555	1589	1201	710	1911	10285	7150
	West Coast		1834	1832	3666	167	186	353	494	593	1087	13982	13157	27139	0	45		32290		West Coast		1933	1894	3827	186	206	392	574	638	1212	14286	13365	27651	0	0		33082		West Coast			99	62	161	19	20	39	80	45
	Whanganui		8791	9394	18185	954	908	1862	1116	1276	2392	22395	23206	45601	0	147		68187		Whanganui		9176	9727	18903	964	919	1883	1346	1382	2728	23045	23478	46523	0	0		70037		Whanganui			385	333	718	10	11	21	230	106
	Overseas/unknown		2089	851	2940	889	408	1297	1284	1160	2444	6049	4449	10498	28	1262		18469		Overseas/unknown		3218	1253	4471	2069	654	2723	2634	1624	4258	11126	5284	16410	165	0		28027		Overseas/unknown			1129	402	1531	1180	246	1426	1350	464
	Various																1452	1452		Various																979	979		Various
	Total		372289	394280	766569	182023	185650	367673	352772	381195	733967	1527581	1579956	3107537	1023	22270	1452	5000491		Total		392809	409070	801879	197528	192766	390294	413314	418501	831815	1594779	1609118	3203897	3649	0	979	5232513		Total			20520	14790	35310	15505	7116	22621	60542	37306
																																										0.0551185	0.0375114	0.0460624	0.0851815	0.0383302	0.0615248	0.171618	0.0978659
	D. Best available population (BAP) 2020 (Te Whatu Ora Health New Zealand https://tewhatuora.shinyapps.io/populations-web-tool/)																			E. Best available population (BAP) 2021 (Te Whatu Ora Health New Zealand https://tewhatuora.shinyapps.io/populations-web-tool/)																			F. Difference between best available population 2020 and 2021
			Māori			Pacific			Asian			European/Other			Gender unknown	Ethnicity unknown		Total				Māori			Pacific			Asian			European/Other			Gender unknown	Ethnicity unknown		Total					Māori			Pacific			Asian
			Male	Female	Total	Male	Female	Total	Male	Female	Total	Male	Female	Total								Male	Female	Total	Male	Female	Total	Male	Female	Total	Male	Female	Total									Male	Female	Total	Male	Female	Total	Male	Female
	Auckland		20250	20270	40520	27200	27690	54890	79860	83170	163030	124370	122920	247290				505730		Auckland		19960	19980	39940	26870	27390	54260	78460	82020	160480	120010	118250	238260				492940		Auckland			-290	-290	-580	-330	-300	-630	-1400	-1150
	Bay of Plenty		33990	34560	68550	2980	2660	5640	10470	10120	20590	82990	88050	171040				265820		Bay of Plenty		34960	35580	70540	3090	2770	5860	10430	10160	20590	84400	89410	173810				270800		Bay of Plenty			970	1020	1990	110	110	220	-40	40
	Canterbury		29610	27820	57430	9540	8440	17980	39510	38770	78280	212350	214770	427120				580810		Canterbury		30490	28680	59170	9760	8650	18410	39690	39100	78790	213920	216550	430470				586840		Canterbury			880	860	1740	220	210	430	180	330
	Capital and Coast		18850	19530	38380	11540	11860	23400	24670	27030	51700	102300	108660	210960				324440		Capital and Coast		19290	19950	39240	11610	11940	23550	24690	27040	51730	101390	108140	209530				324050		Capital and Coast			440	420	860	70	80	150	20	10
	Counties Manukau		46990	49050	96040	66350	68090	134440	84260	83410	167670	98940	97090	196030				594180		Counties Manukau		48110	50170	98280	67670	69500	137170	84190	83620	167810	98970	96840	195810				599070		Counties Manukau			1120	1120	2240	1320	1410	2730	-70	210
	Hawke's Bay		24050	25540	49590	4590	3610	8200	5210	5260	10470	55080	56630	111710				179970		Hawke's Bay		24660	26140	50800	4700	3660	8360	5190	5240	10430	55480	56580	112060				181650		Hawke's Bay			610	600	1210	110	50	160	-20	-20
	Hutt Valley		14580	14130	28710	6540	6380	12920	12030	12480	24510	45760	46750	92510				158650		Hutt Valley		14960	14530	29490	6640	6470	13110	12030	12460	24490	45780	46760	92540				159630		Hutt Valley			380	400	780	100	90	190	0	-20
	Lakes		21370	22230	43600	1660	1460	3120	5410	5490	10900	29960	30030	59990				117610		Lakes		21850	22760	44610	1690	1500	3190	5420	5500	10920	29680	29620	59300				118020		Lakes			480	530	1010	30	40	70	10	10
	MidCentral		19830	19900	39730	3450	3110	6560	7730	8340	16070	60940	64200	125140				187500		MidCentral		20340	20400	40740	3550	3220	6770	7730	8310	16040	61050	64540	125590				189140		MidCentral			510	500	1010	100	110	210	0	-30
	Nelson Marlborough		9140	8880	18020	1990	1410	3400	4460	5270	9730	66260	66050	132310				163460		Nelson Marlborough		9400	9100	18500	2060	1490	3550	4450	5230	9680	66590	66050	132640				164370		Nelson Marlborough			260	220	480	70	80	150	-10	-40
	Northland		34890	35610	70500	2670	2430	5100	4210	4550	8760	55080	55160	110240				194600		Northland		35670	36400	72070	2820	2560	5380	4190	4500	8690	56290	56370	112660				198800		Northland			780	790	1570	150	130	280	-20	-50
	South Canterbury		2890	2850	5740	605	495	1100	1960	1880	3840	25830	25570	51400				62080		South Canterbury		2970	2930	5900	635	515	1150	1940	1910	3850	25890	25470	51360				62260		South Canterbury			80	80	160	30	20	50	-20	30
	Southern		19350	18660	38010	4540	3970	8510	13460	14450	27910	136960	138360	275320				349750		Southern		19920	19250	39170	4650	4060	8710	13480	14420	27900	136610	137750	274360				350140		Southern			570	590	1160	110	90	200	20	-30
	Tairāwhiti		13560	14200	27760	760	620	1380	750	785	1535	10470	10250	20720				51395		Tairāwhiti		13870	14510	28380	780	640	1420	760	780	1540	10360	10080	20440				51780		Tairāwhiti			310	310	620	20	20	40	10	-5
	Taranaki		12970	12820	25790	1010	905	1915	3330	3340	6670	45130	45920	91050				125425		Taranaki		13350	13150	26500	1050	930	1980	3300	3300	6600	45430	46170	91600				126680		Taranaki			380	330	710	40	25	65	-30	-40
	Waikato		52980	53620	106600	7790	7360	15150	25070	25520	50590	132670	136200	268870				441210		Waikato		54450	55040	109490	8170	7720	15890	25320	25810	51130	133890	137430	271320				447830		Waikato			1470	1420	2890	380	360	740	250	290
	Wairarapa		4510	4570	9080	580	535	1115	835	895	1730	18170	18930	37100				49025		Wairarapa		4670	4710	9380	605	550	1155	830	895	1725	18580	19330	37910				50170		Wairarapa			160	140	300	25	15	40	-5	0
	Waitematā		32800	32220	65020	23830	23540	47370	77110	81880	158990	180940	184770	365710				637090		Waitematā		33560	32910	66470	24190	23870	48060	77430	82060	159490	178530	182520	361050				635070		Waitematā			760	690	1450	360	330	690	320	180
	West Coast		2010	2000	4010	195	190	385	650	735	1385	13910	13120	27030				32810		West Coast		2040	2020	4060	195	195	390	640	735	1375	13920	13150	27070				32895		West Coast			30	20	50	0	5	5	-10	0
	Whanganui		9550	9760	19310	1180	1010	2190	1380	1400	2780	21590	22550	44140				68420		Whanganui		9790	9990	19780	1200	1040	2240	1340	1410	2750	21640	22640	44280				69050		Whanganui			240	230	470	20	30	50	-40	10
	Total		424170	428220	852390	179000	175765	354765	402365	414775	817140	1519700	1545980	3065680				5089975		Total		434310	438200	872510	181935	178670	360605	401510	414500	816010	1518410	1543650	3062060				5111185		Total			10140	9980	20120	2935	2905	5840	-855	-275
																																										0.0239055	0.0233058	0.0236042	0.0163966	0.0165278	0.0164616	-0.00212494	-0.00066301
	G. Difference BAP and HSU Population 2020 in numbers																			H. Difference BAP and HSU Population 2021 in numbers
			Māori			Pacific			Asian			European/Other			Total							Māori			Pacific			Asian			European/Other			Total
			Male	Female	Total	Male	Female	Total	Male	Female	Total	Male	Female	Total								Male	Female	Total	Male	Female	Total	Male	Female	Total	Male	Female	Total
	Auckland		3148	2190	5338	-1494	-2246	-3740	8091	4640	12731	2606	-1461	1145	15474					Auckland		1691	1324	3015	-3085	-3263	-6348	-4156	-3100	-7256	-7690	-7316	-15006	-25595
	Bay of Plenty		2882	1777	4659	476	366	842	2225	1672	3897	-647	-1742	-2389	7009					Bay of Plenty		2201	1425	3626	-653	186	-467	-657	128	-529	-2758	-2723	-5481	-2851
	Canterbury		4636	2823	7459	848	226	1074	8167	5022	13189	366	-4590	-4224	17498					Canterbury		3764	2160	5924	368	-32	336	1678	713	2391	-8450	-9159	-17609	-8958
	Capital and Coast		1999	1677	3676	8	-346	-338	4341	3522	7863	816	-109	707	11908					Capital and Coast		1726	1665	3391	-460	-518	-978	1500	1553	3053	-4950	-2411	-7361	-1895
	Counties Manukau		5903	3869	9772	-6766	-8889	-15655	5838	4185	10023	1221	-1222	-1	4139					Counties Manukau		5539	4091	9630	-9253	-10177	-19430	-4435	-1347	-5782	-1913	-1738	-3651	-19233
	Hawke's Bay		2217	1415	3632	1079	370	1449	1210	967	2177	272	-1528	-1256	6002					Hawke's Bay		1730	1181	2911	-188	274	86	31	251	282	-1046	-2586	-3632	-353
	Hutt Valley		1917	1234	3151	368	146	514	1804	1353	3157	-1138	-2037	-3175	3647					Hutt Valley		1755	1221	2976	213	-3	210	266	335	601	-1767	-1895	-3662	125
	Lakes		2106	1515	3621	150	37	187	1560	1352	2912	-983	-1863	-2846	3874					Lakes		1465	1126	2591	70	28	98	587	876	1463	-2296	-2574	-4870	-718
	MidCentral		3727	2413	6140	405	168	573	1573	1513	3086	-881	-2005	-2886	6913					MidCentral		2950	1994	4944	264	94	358	263	614	877	-3757	-2485	-6242	-63
	Nelson Marlborough		1690	880	2570	401	170	571	1247	1415	2662	1224	-452	772	6575					Nelson Marlborough		1464	776	2240	-1106	114	-992	272	722	994	-823	-1966	-2789	-547
	Northland		1932	592	2524	679	564	1243	1027	744	1771	-1971	-2050	-4021	1517					Northland		1239	34	1273	561	554	1115	222	218	440	-3241	-2573	-5814	-2986
	South Canterbury		544	413	957	-36	-59	-95	464	341	805	-145	-583	-728	939					South Canterbury		496	389	885	-164	-86	-250	43	226	269	-450	-851	-1301	-397
	Southern		3589	2661	6250	471	26	497	3600	3347	6947	1954	-377	1577	15271					Southern		3324	2560	5884	-160	-137	-297	955	1764	2719	-3737	-4215	-7952	354
	Tairāwhiti		1102	740	1842	72	121	193	76	73	149	-878	-1170	-2048	136					Tairāwhiti		863	729	1592	-50	118	68	-147	-45	-192	-1302	-1518	-2820	-1352
	Taranaki		2282	1205	3487	113	116	229	840	537	1377	-692	-1514	-2206	2887					Taranaki		1976	1089	3065	82	92	174	244	165	409	-2387	-2276	-4663	-1015
	Waikato		7291	4921	12212	800	502	1302	4195	3582	7777	-1681	-3218	-4899	16392					Waikato		6089	4186	10275	627	454	1081	93	1272	1365	-7949	-6156	-14105	-1384
	Wairarapa		312	184	496	28	30	58	112	96	208	70	-220	-150	612					Wairarapa		242	161	403	-4	15	11	-111	10	-101	-207	-216	-423	-110
	Waitematā		5758	3748	9506	10	-885	-875	4087	113	4200	-468	-2693	-3161	9670					Waitematā		5484	3883	9367	-831	-1265	-2096	-5878	-6857	-12735	-8749	-6473	-15222	-20686
	West Coast		176	168	344	28	4	32	156	142	298	-72	-37	-109	565					West Coast		107	126	233	9	-11	-2	66	97	163	-366	-215	-581	-187
	Whanganui		759	366	1125	226	102	328	264	124	388	-805	-656	-1461	380					Whanganui		614	263	877	236	121	357	-6	28	22	-1405	-838	-2243	-987
	Total		53970	34791	88761	-2134	-9477	-11611	50877	34740	85617	-1832	-29527	-31359	131408					Total		44719	30383	75102	-13524	-13442	-26966	-9170	-2377	-11547	-65243	-60184	-125427	-88838
	I. Difference BAP and HSU Population 2020 as a percentage of BAP																			J. Difference BAP and HSU Population 2021 as a percentage of BAP
			Māori			Pacific			Asian			European/Other			Total							Māori			Pacific			Asian			European/Other			Total
			Male	Female	Total	Male	Female	Total	Male	Female	Total	Male	Female	Total								Male	Female	Total	Male	Female	Total	Male	Female	Total	Male	Female	Total
	Auckland		0.155457	0.108041	0.131737	-0.0549265	-0.0811123	-0.0681363	0.101315	0.0557893	0.0780899	0.0209536	-0.0118858	0.00463019	0.0305974					Auckland		0.0847194	0.0662663	0.0754882	-0.114812	-0.119131	-0.116992	-0.0529697	-0.0377957	-0.0452144	-0.064078	-0.0618689	-0.0629816	-0.0519232
	Bay of Plenty		0.0847896	0.0514178	0.067965	0.159732	0.137594	0.149291	0.212512	0.165217	0.189267	-0.00779612	-0.0197842	-0.0139675	0.0263675					Bay of Plenty		0.0629577	0.0400506	0.0514035	-0.211327	0.067148	-0.0796928	-0.0629914	0.0125984	-0.0256921	-0.0326777	-0.0304552	-0.0315344	-0.0105281
	Canterbury		0.156569	0.101474	0.12988	0.0888889	0.0267773	0.059733	0.206707	0.129533	0.168485	0.00172357	-0.0213717	-0.00988949	0.0301269					Canterbury		0.12345	0.0753138	0.100118	0.0377049	-0.00369942	0.018251	0.0422777	0.0182353	0.0303465	-0.0395007	-0.0422951	-0.0409065	-0.0152648
	Capital and Coast		0.106048	0.0858679	0.0957791	0.000693241	-0.0291737	-0.0144444	0.175963	0.1303	0.152089	0.00797654	-0.00100313	0.00335135	0.0367032					Capital and Coast		0.0894764	0.0834586	0.0864169	-0.039621	-0.0433836	-0.0415287	0.0607533	0.0574334	0.059018	-0.0488214	-0.0222952	-0.035131	-0.00584786
	Counties Manukau		0.125622	0.0788787	0.101749	-0.101974	-0.130548	-0.116446	0.0692855	0.0501738	0.0597781	0.0123408	-0.0125863	-5.10126e-06	0.0069659					Counties Manukau		0.115132	0.0815428	0.0979853	-0.136737	-0.146432	-0.141649	-0.0526785	-0.0161086	-0.0344556	-0.0193291	-0.0179471	-0.0186456	-0.0321048
	Hawke's Bay		0.092183	0.0554033	0.0732406	0.235076	0.102493	0.176707	0.232246	0.18384	0.207927	0.00493827	-0.0269822	-0.0112434	0.03335					Hawke's Bay		0.0701541	0.0451798	0.0573031	-0.04	0.0748634	0.0102871	0.00597303	0.0479008	0.0270374	-0.0188536	-0.0457052	-0.0324112	-0.0019433
	Hutt Valley		0.131481	0.0873319	0.109753	0.0562691	0.022884	0.0397833	0.149958	0.108413	0.128805	-0.0248689	-0.0435722	-0.0343206	0.0229877					Hutt Valley		0.117313	0.084033	0.100916	0.0320783	-0.000463679	0.0160183	0.0221114	0.026886	0.0245406	-0.0385976	-0.0405261	-0.0395721	0.000783061
	Lakes		0.0985494	0.0681511	0.0830505	0.0903614	0.0253425	0.0599359	0.288355	0.246266	0.267156	-0.0328104	-0.062038	-0.0474412	0.0329394					Lakes		0.0670481	0.0494728	0.0580811	0.0414201	0.0186667	0.030721	0.108303	0.159273	0.133974	-0.0773585	-0.0869007	-0.0821248	-0.00608371
	MidCentral		0.187948	0.121256	0.154543	0.117391	0.0540193	0.0873476	0.203493	0.181415	0.192035	-0.0144568	-0.0312305	-0.0230622	0.0368693					MidCentral		0.145034	0.0977451	0.121355	0.0743662	0.0291925	0.0528804	0.0340233	0.0738869	0.0546758	-0.0615397	-0.0385033	-0.0497014	-0.000333087
	Nelson Marlborough		0.184902	0.0990991	0.142619	0.201508	0.120567	0.167941	0.279596	0.268501	0.273587	0.0184727	-0.0068433	0.00583478	0.0402239					Nelson Marlborough		0.155745	0.0852747	0.121081	-0.536893	0.0765101	-0.279437	0.0611236	0.13805	0.102686	-0.0123592	-0.0297653	-0.0210268	-0.00332786
	Northland		0.055374	0.0166245	0.0358014	0.254307	0.232099	0.243725	0.243943	0.163516	0.202169	-0.0357843	-0.0371646	-0.036475	0.00779548					Northland		0.0347351	0.000934066	0.0176634	0.198936	0.216406	0.207249	0.0529833	0.0484444	0.0506329	-0.0575768	-0.0456448	-0.0516066	-0.0150201
	South Canterbury		0.188235	0.144912	0.166725	-0.0595041	-0.119192	-0.0863636	0.236735	0.181383	0.209635	-0.00561363	-0.0228002	-0.0141634	0.0151256					South Canterbury		0.167003	0.132765	0.15	-0.258268	-0.16699	-0.217391	0.0221649	0.118325	0.0698701	-0.0173812	-0.0334119	-0.025331	-0.00637649
	Southern		0.185478	0.142605	0.16443	0.103744	0.00654912	0.0584019	0.267459	0.231626	0.248907	0.0142669	-0.00272478	0.00572788	0.0436626					Southern		0.166867	0.132987	0.150217	-0.0344086	-0.0337438	-0.0340987	0.0708457	0.12233	0.0974552	-0.0273552	-0.0305989	-0.0289838	0.00101102
	Tairāwhiti		0.0812684	0.0521127	0.0663545	0.0947368	0.195161	0.139855	0.101333	0.0929936	0.0970684	-0.0838586	-0.114146	-0.0988417	0.00264617					Tairāwhiti		0.0622206	0.0502412	0.0560958	-0.0641026	0.184375	0.0478873	-0.193421	-0.0576923	-0.124675	-0.125676	-0.150595	-0.137965	-0.0261105
	Taranaki		0.175944	0.0939938	0.135207	0.111881	0.128177	0.119582	0.252252	0.160778	0.206447	-0.0153335	-0.0329704	-0.0242284	0.0230177					Taranaki		0.148015	0.0828137	0.11566	0.0780952	0.0989247	0.0878788	0.0739394	0.05	0.0619697	-0.0525424	-0.0492961	-0.0509061	-0.00801231
	Waikato		0.137618	0.0917755	0.114559	0.102696	0.0682065	0.0859406	0.167331	0.140361	0.153726	-0.0126705	-0.023627	-0.0182207	0.0371524					Waikato		0.111827	0.0760538	0.0938442	0.0767442	0.0588083	0.0680302	0.00367299	0.0492832	0.0266967	-0.0593696	-0.0447937	-0.0519866	-0.00309046
	Wairarapa		0.0691796	0.0402626	0.0546256	0.0482759	0.0560748	0.0520179	0.134132	0.107263	0.120231	0.0038525	-0.0116218	-0.00404313	0.0124834					Wairarapa		0.0518201	0.0341826	0.0429638	-0.00661157	0.0272727	0.00952381	-0.133735	0.0111732	-0.0585507	-0.011141	-0.0111743	-0.011158	-0.00219255
	Waitematā		0.175549	0.116325	0.146201	0.000419639	-0.0375956	-0.0184716	0.0530022	0.00138007	0.0264168	-0.00258649	-0.0145749	-0.00864346	0.0151784					Waitematā		0.163409	0.117988	0.140921	-0.034353	-0.0529954	-0.0436122	-0.0759137	-0.0835608	-0.0798483	-0.0490058	-0.0354646	-0.0421604	-0.0325728
	West Coast		0.0875622	0.084	0.0857855	0.14359	0.0210526	0.0831169	0.24	0.193197	0.215162	-0.00517613	-0.00282012	-0.00403256	0.0172204					West Coast		0.052451	0.0623762	0.0573892	0.0461538	-0.0564103	-0.00512821	0.103125	0.131973	0.118545	-0.0262931	-0.0163498	-0.0214629	-0.00568475
	Whanganui		0.0794764	0.0375	0.05826	0.191525	0.10099	0.149772	0.191304	0.0885714	0.139568	-0.0372858	-0.0290909	-0.0330992	0.00555393					Whanganui		0.0627171	0.0263263	0.0443377	0.196667	0.116346	0.159375	-0.00447761	0.0198582	0.008	-0.0649261	-0.0370141	-0.0506549	-0.014294
	Total		0.127237	0.0812456	0.104132	-0.0119218	-0.0539186	-0.0327287	0.126445	0.0837563	0.104776	-0.0012055	-0.0190992	-0.0102291	0.025817					Total		0.102966	0.0693359	0.0860758	-0.0743342	-0.0752337	-0.0747799	-0.0228388	-0.00573462	-0.0141506	-0.042968	-0.0389881	-0.0409616	-0.0173811
[truncated: 7 more columns]
